# Supplementary material for: Post-Functionalization of Bromo-Substituted Ether-Linked Polymers via Ullman Coupling Reaction: Synthesis, Characterization and Their Role toward Carbon Dioxide Capture
Source: MDPI journal article supplement (doi:10.3390/separations9030055), 2022-02-23
Supplement: s1 [file s1]

# Post Functionalization of Bromo-Substituted Ether-Linked Polymers Via Ullman Coupling Reaction: Synthesis, Characterization and their Role Toward Carbon Dioxide Capture

Tareq M. A. Al-Shboul <sup>1</sup>, Suha S. Al-Tarawneh <sup>1\*</sup>, Taher S. Ababneh <sup>2</sup>, and Taghreed M. A. Jazzazi <sup>2\*</sup>

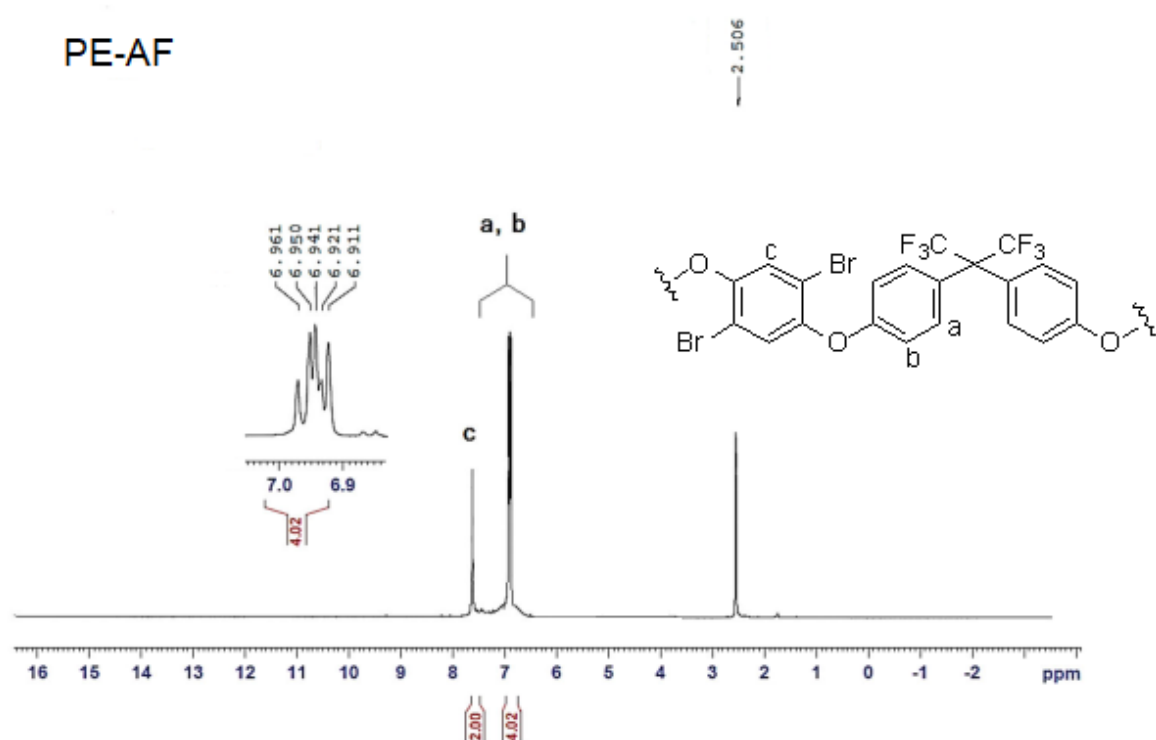

Figure S1. <sup>1</sup>H-NMR of PE-AF in DMSO-d<sub>6</sub>.

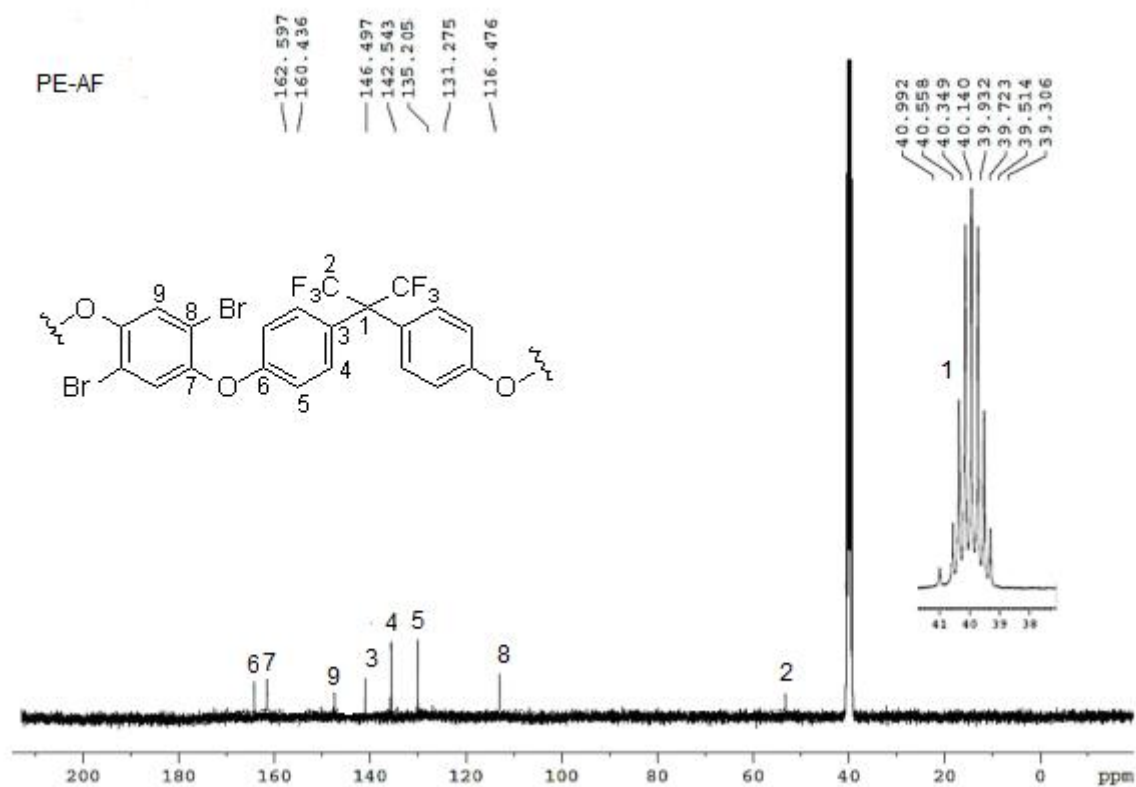

Figure S2.  $^{13}\text{C}$ -NMR of PE-AF in  $\text{DMSO-d}_6$ .

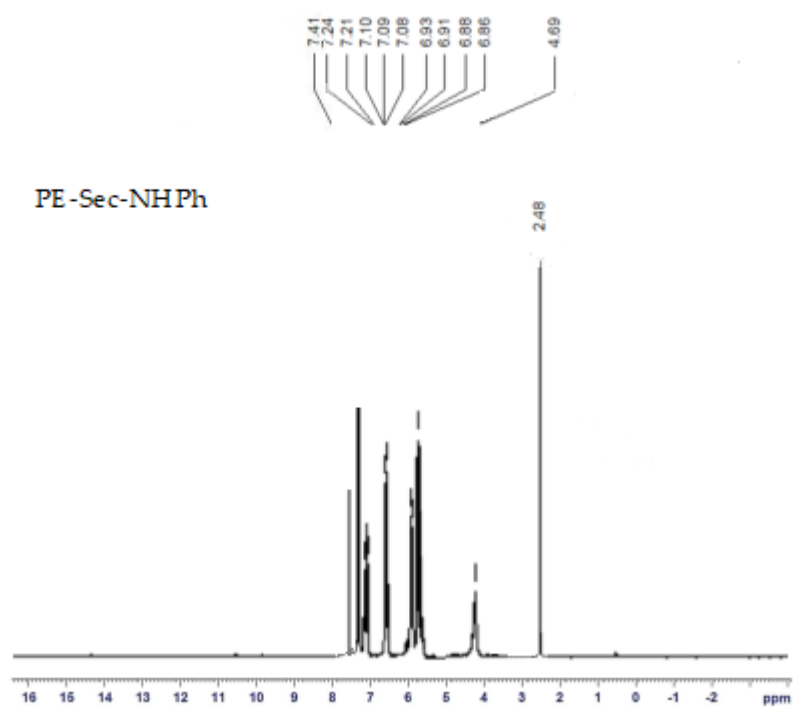

Figure S3.  $^1\text{H}$ -NMR of PE-Sec-NHPh in  $\text{DMSO-d}_6$ .

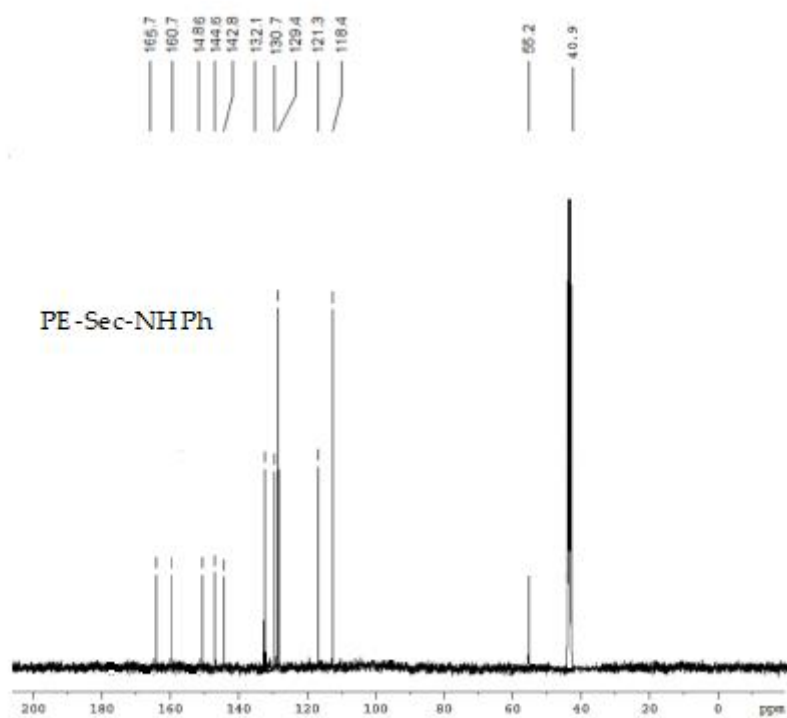

**Figure S4.** <sup>13</sup>C-NMR of PE-Sec-NHPh in DMSO-d<sub>6</sub>.
